# Supplementary material
Source: publisher figshare collection journal article supplement (https://acs.figshare.com/ndownloader/files/4078558)
Supplement: Supplementary file 1 [file 4078558]

# Functionalized vesicles based on amphiphilic boronic acids: a system for recognizing biologically important polyols

Oleksandr Savsunenko<sup>1,2</sup>, Hubert Matondo<sup>2</sup>, Sophie Franceschi-Messant<sup>2</sup>, Emile Perez<sup>2</sup>, Anatoly F. Popov<sup>1</sup>, Isabelle Rico-Lattes<sup>2</sup>, Armand Lattes<sup>2</sup>, Yevgen Karpichev<sup>\*1</sup>

## Supporting material

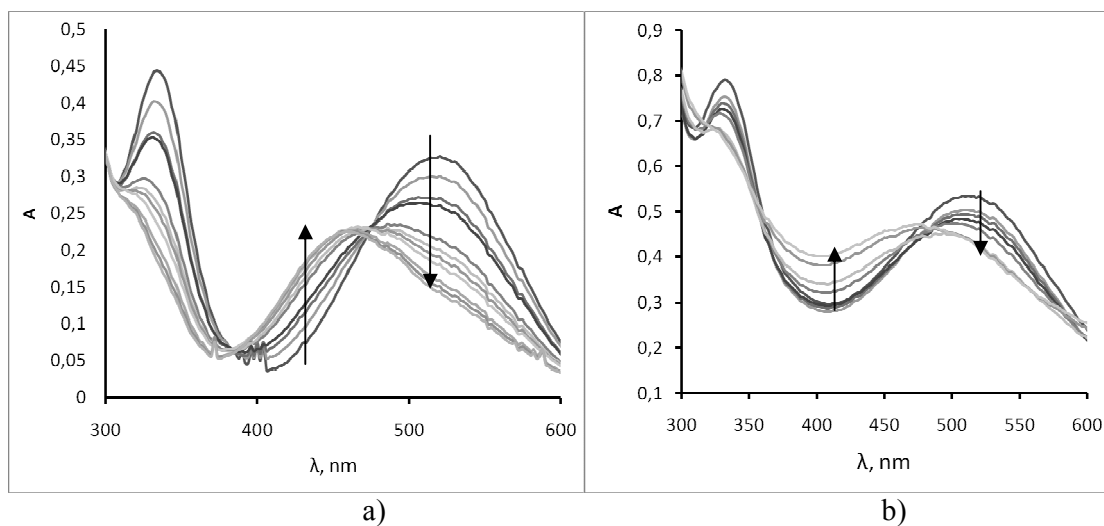

**Figure S1:** UV-Vis titration of **1** (a) and **2** (b). pH 4...11

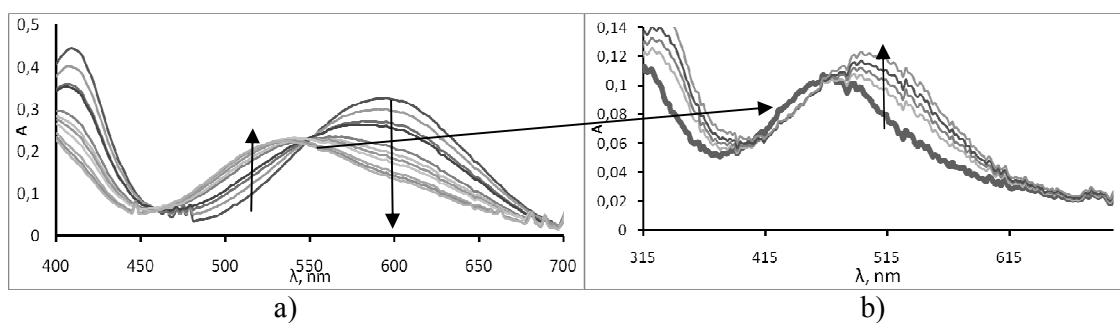

**Figure S2:** a) Changes in ARS spectra in increase of  $[2]_{\text{tot}}$  from 0 to 50 mM at  $[ARS] = 0.03$  mM. b) Changes in ARS spectra at  $[ARS] = 0.01$  mM and  $[2]_{\text{tot}} = 1$  mM ( $5 \cdot \text{CAC}$ ) with increasing concentration of fructose from 0 to 0.24 M

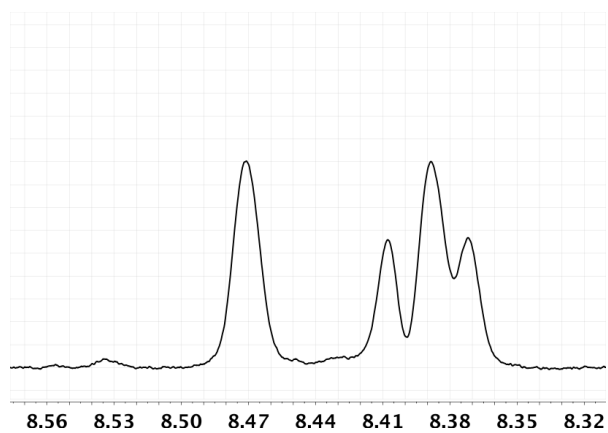

**Figure S3:**  $^1\text{H}$  NMR spectrum of **3** at normalized concentrations  $[\text{D}]_t/\text{CAC} = 5$ ; phosphate buffer (pH 7.4), 10% $\text{D}_2\text{O}$ . 500 MHz (CryoProbe).
